# Supplementary material for: Loss of Lipid Virulence Factors Reduces the Efficacy of the BCG Vaccine
Source: PubMed Central journal article supplement (PMC4928182; doi:10.1038/srep29076), 2016-06-30
Supplement: srep29076-s1.pdf [file srep29076-s1.pdf]

## **Loss of Lipid Virulence Factors Reduces the Efficacy of the BCG Vaccine**

Vanessa Tran<sup>†</sup>, Sang Kyun Ahn, Mark Ng, Ming Li, and Jun Liu<sup>\*</sup>

*Department of Molecular Genetics, University of Toronto, Toronto, ON, Canada*

\*Corresponding author: Jun Liu (jun.liu@utoronto.ca)

<sup>†</sup>Present address: Vanessa Tran, Sandra A. Rotman Laboratories, Sandra Rotman Centre for Global Health, Toronto General Research Institute – University Health Network, Toronto, ON, Canada

## Supplementary Information

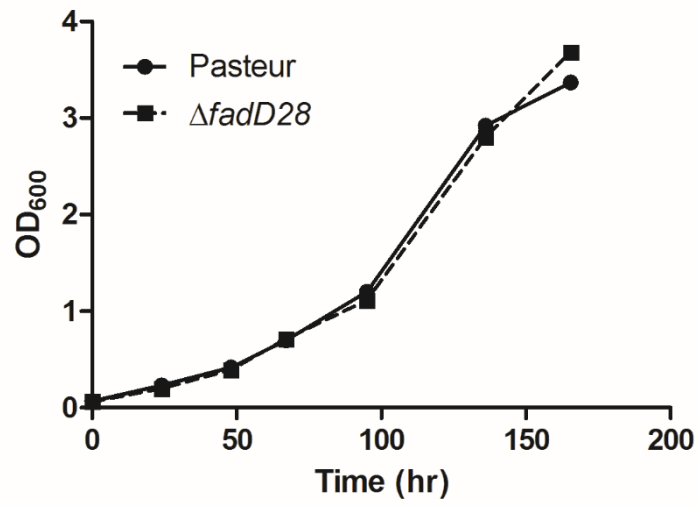

**Fig S1. Growth curve of WT and PDIM/PGL knockout strains of BCG-Pasteur.** Strains were grown in 7H9 broth and  $OD_{600}$  was measured every 24 hr.

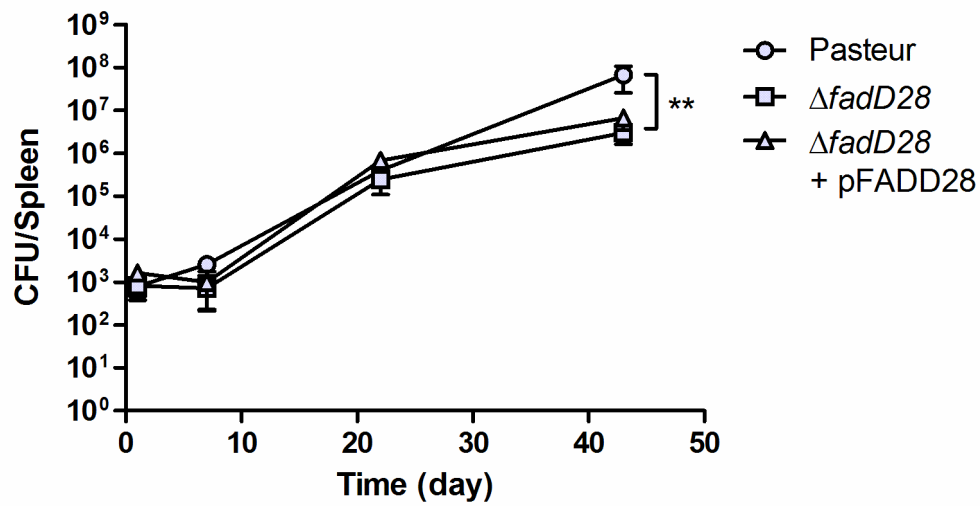

**Fig S2. The PDIM/PGL deficient mutant of BCG-Pasteur is less virulent in SCID mice.**

SCID mice were infected intravenously with  $10^4$  CFU of BCG-Pasteur (Pasteur), the  $\Delta fadD28$ , or complemented strain ( $\Delta fadD28 + pFADD28$ ). Bacterial burden in the spleen was determined at various time points (\*\*,  $p < 0.01$ , BCG-Pasteur vs.  $\Delta fadD28$ ; two-way ANOVA).

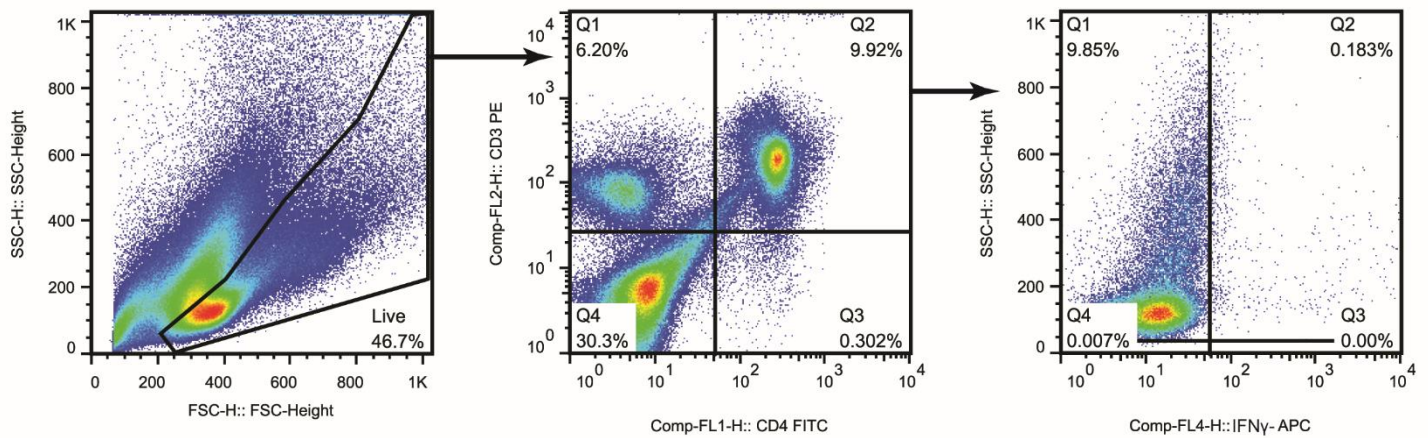

**Fig S3. Sample gating strategy for detection of IFN- $\gamma$ -producing T-cells.** The population of live cells were gated from the lymphocyte population. Live cells were subsequently plotted with CD3<sup>+</sup> vs CD4<sup>+</sup>/CD8<sup>+</sup> and double positive cells were further plotted with SSC vs IFN- $\gamma$ . Gates were set based on isotype controls.

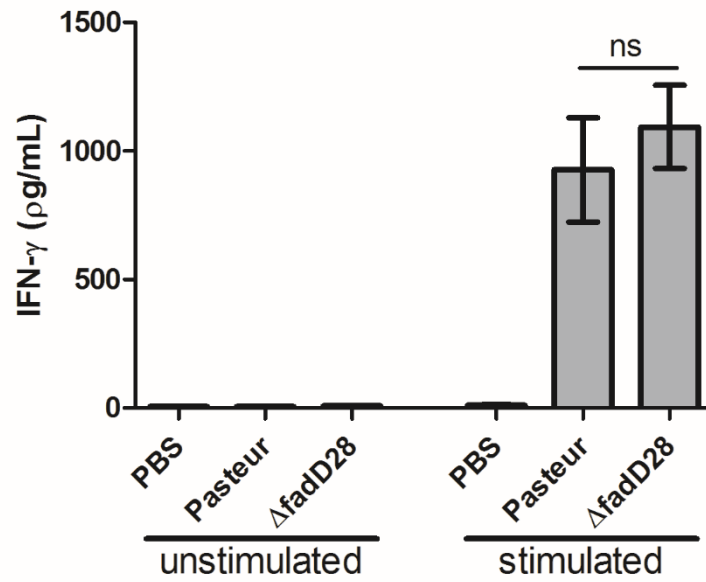

**Fig S4. The loss of PDIMs/PGLs does not affect production of IFN- $\gamma$ .** C57BL/6 mice were immunized subcutaneously with the WT BCG-Pasteur,  $\Delta$ fadD28, or PBS/0.01% Tween 80. At 9 weeks post-vaccination, mice were sacrificed and splenocytes were harvested. Splenocytes were incubated with or without PPD for 72 hr and IFN- $\gamma$  was measured by ELISA (BD Biosciences) (ns, not significant).

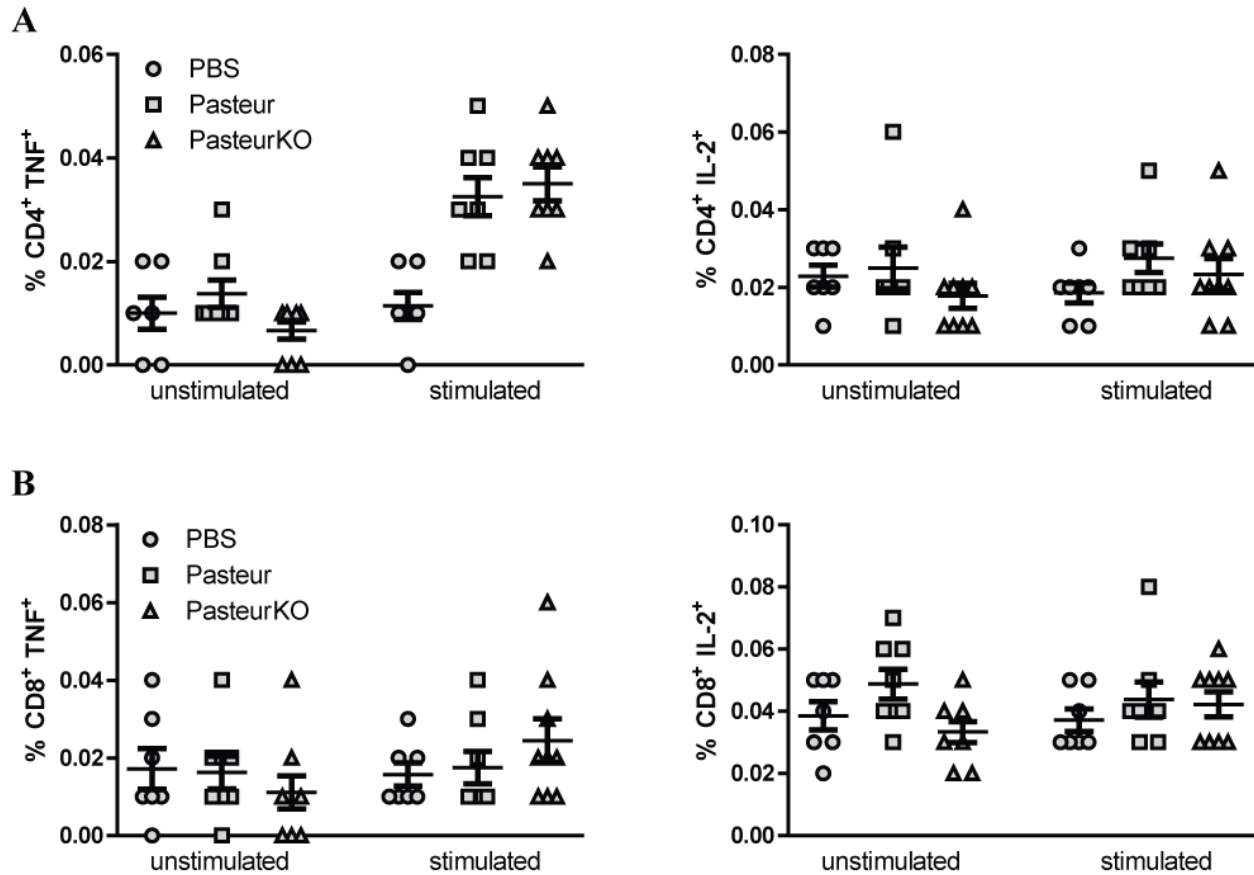

**Fig S5. The loss of PDIMs/PGLs does not affect production of TNF or IL-2.** Intracellular cytokine staining analysis of TNF and IL-2 production by CD4<sup>+</sup> and CD8<sup>+</sup> T-cells. C57BL/6 mice were immunized subcutaneously with the WT BCG-Pasteur,  $\Delta$ *fadD28*, or PBS/0.01% Tween 80. At 9 weeks post-vaccination, mice were sacrificed and splenocytes were harvested. Splenocytes were incubated with or without PPD for 24 hr followed by staining for T-cell surface markers (CD3-PE, CD4-FITC, CD8a-PerCy5.5) and intracellular TNF and IL-2. Samples were analyzed by BD FACSCalibur<sup>TM</sup> and FlowJo<sup>®</sup> Software (mean  $\pm$  SEM).
